# 1 Cas9HF1 enhanced specificity in *Ustilago maydis*

2 Weiliang Zuo, Jasper RL Depotter, Gunther Doehlemann<sup>#</sup>

3  
4 Botanical Institute and Cluster of Excellence on Plant Sciences (CEPLAS), University of Cologne,  
5 BioCenter, Zulpicher Str. 47a, 50674 Cologne, Germany.

6 <sup>#</sup>correspondence to: Gunther Doehlemann; email: g.doehlemann@uni-koeln.de

7  
8 Keywords: CRISPR/Cas9; *Ustilago maydis*, off-site targets

## 9 10 **Abstract**

11 The clustered regularly interspaced short palindromic repeats (CRISPR)-Cas9 system is  
12 widely used as a tool to precisely manipulate genomic sequence targeted by sgRNA (single  
13 guide RNA) and is adapted in different species for genome editing. One of the major  
14 concerns of CRISPR-Cas9 is the possibility of off-target effects, which can be remedied by  
15 the deployment of high fidelity Cas9 variants. *Ustilago maydis* is a maize fungal pathogen,  
16 which has served as a model organism for biotrophic pathogens for decades. The successful  
17 adaption of CRISPR-Cas9 in *U. maydis* greatly facilitated effector biology studies. Here, we  
18 constructed an *U. maydis* reporter strain that allows *in vivo* quantification of efficiency and  
19 target specificity of three high fidelity Cas9 variants, Cas9HF1, Cas9esp1.1 and Cas9hypa.  
20 This approach identified Cas9HF1 as most specific Cas9 variant in *U. maydis*. Furthermore,  
21 whole genome sequencing showed absence of off-target effects in *U. maydis* by CRISPR-  
22 Cas9 editing.

## 23 24 **Introduction**

25 The CRISPR-Cas9 is part of the bacterial immune system to fend off bacteriophage  
26 infection, which was first identified in *Streptococcus pyogenes* (Barrangou et al. 2007). The  
27 Cas9 protein serves as endonuclease and induces double strand breaks in the targeted  
28 region (Jinek et al. 2012) where the specificity of Cas9 is determined by the loaded guide  
29 RNA (gRNA) containing the first 20 nt spacer which is complement to the sequence of gene-  
30 of-interest with a protospacer adjacent motif (PAM) (Gasiunas et al. 2012). The double  
31 strand break is then repaired by the error-prone non-homologous end joining (NHEJ) or  
32 homologous direct repair. The capacity of CRISPR-Cas9 to manipulate defined genomic  
33 targets in addition to the easy design and manipulation makes it a powerful gene editing tool  
34 to create gene knockouts or conversion (Charpentier and Doudna 2013; Jiang and Doudna  
35 2017). Currently, CRISPR-Cas9 based technologies are also widely used in various  
36 applications such as activation of gene expression, genomic labeling (Chen et al. 2013,  
37 2016; Ma et al. 2015; Tanenbaum et al. 2014), epigenetic modification (Liao et al. 2017;  
38 Pulecio et al. 2017) and translational disruption (Pulecio et al. 2017). However, a major  
39 concern of CRISPR-Cas9 technology is the possibility of off-target effects, where

40 sequences shared high similarity to the target are also cleaved by Cas9 (Fu et al. 2013; Hsu  
41 et al. 2013; Kosicki, Tomberg, and Bradley 2018).

42 To solve this problem, several strategies were applied, including using lower levels of  
43 active Cas9 (Davis et al. 2015; Pulecio et al. 2017), shortening the gRNA sequence at the 5'-  
44 end region (Fu et al. 2014), producing Cas9 nickase mutant or a Cas9 nuclease mutant  
45 fused with a FokI nuclease domain (Fu et al. 2014; Guilinger, Thompson, and Liu 2014).  
46 However, these methods often compromise the on-target efficiency or complicate the cloning  
47 process. Additionally, high fidelity Cas9 variants were generated such as Cas9HF1  
48 (Slaymaker et al. 2016), Cas9esp1.0, 1.1 (Kleinstiver et al. 2016) and Cas9hypo (Chen et al.  
49 2017), which demonstrate enhanced specificity without reducing on-target efficiency.

50 *Ustilago maydis* is a pathogenic fungus that causes smut disease in maize. It can  
51 infect all the above-ground tissues of maize plants and induces local tumor formation within  
52 two weeks after infection under glasshouse conditions (Kämper et al. 2006). Compared to  
53 other smut fungi, the unique and rapid tumor development makes it an excellent model to  
54 study biotrophic plant pathogens. The pathogenicity of *U. maydis* is initiated by the  
55 recognition and fusion of different mating strains, which is accompanied by morphological  
56 switch from yeast like growth of haploid sporidia to a diploid filament (Bölker, Urban, and  
57 Kahmann 1992; Spellig et al. 1994). The assembly of compatible mating genes in one single  
58 genetic background to create the solopathogenic strain SG200 facilitates pathogenic  
59 development of *U. maydis* without prior mating (Kämper et al. 2006).

60 Similar to other plant pathogens, the virulence of *U. maydis* is largely determined by  
61 its repertoire of secreted effector proteins, which are mostly highly expressed during host  
62 infection to trigger fungal growth and cause disease (Skibbe et al. 2010). Only few individual  
63 effector genes with large effect on virulence have been functional characterization (Djamei et  
64 al. 2011; Doehlemann et al. 2009; Ma et al. 2018; Mueller et al. 2013; Redkar et al. 2015;  
65 Tanaka et al. 2014). However, many effectors are present in gene families and / or show  
66 functional redundancy, which requires deletion of multiple genes at the same time to obtain  
67 visible virulence defects (Zuo et al. 2019, in press). An FLP (flippase)-recombinase based  
68 system for marker rescue allows multiple gene deletions in *U. maydis*, however is limited by  
69 the potential genome rearrangement between remaining FRT (flippase recognition target)  
70 sequences in the genome and time consuming process (Khrunyk et al. 2010). To make use  
71 of the significant advantages of CRISPR-Cas9 over classical homologous recombination,  
72 Schuster et. al adapted the CRISPR-Cas9 system in *U. maydis* by generating a codon  
73 optimized Cas9 protein and expression of the sgRNA under control of the *U. maydis* U6  
74 promoter, which allowed high efficiency in genome editing (Schuster et al. 2016).  
75 Furthermore, tRNA promoters were used for multiplexing sgRNAs, empowering knockouts of  
76 multiple genes to be generated by one construct (Schuster, Schweizer, and Kahmann 2018).

77 The CRISPR-Cas9 efficiency in *U. maydis* was further improved up to 40-100% by  
78 expressing Cas9 under *U. maydis* heat shock protein 70 promoter even with sgRNA has  
79 20th PAM-proximal mismatch (Schuster et al. 2018). However, this brought concerns of how  
80 to increase Cas9 specificity in *U. maydis* without sacrifice the high efficiency.

81 In this study, we generated a *U. maydis* reporter strain expressing green fluorescent  
82 protein (GFP) in an expression cassette flanked by designed off-targets with 19th PAM-  
83 proximal mismatch sequence for a *bw2* sgRNA. Using this reporter strain, we found that  
84 Cas9HF1 confers significantly increased fidelity in *U. maydis* when compared to Cas9wt and  
85 other Cas9 variants. Furthermore, by Illumina-sequencing we detected no off-target effect in  
86 the *U. maydis* genome by testing two different sgRNAs by CRISPR-Cas9 editing with of the  
87 tested Cas9 versions.

88

## 89 Results

### 90 Construction of GFP reporter strain for off-target screening

91 In previous studies, two main strategies were used to test specificity of Cas9 variants. One is  
92 use sgRNAs have been reported to have off-target effects and monitor these known off-  
93 targets sites in the mutants to evaluate the specificity of Cas9 variants (Chen et al. 2017;  
94 Kleinstiver et al. 2016; Slaymaker et al. 2016), the other approach is to conduct gene  
95 knockouts by using sgRNAs with different mismatched nucleotides to the target and then  
96 detected the editing efficiency (Kim et al. 2017; Zhang et al. 2017). Although CRISPR-Cas9  
97 was adapted in *U. maydis*, there are few publications on the application of this technology for  
98 gene deletion, not to mention the discovery of sgRNAs with off-target effect confirmed by  
99 whole genome sequencing or *in-vitro* test.

100 To test the high specificity Cas9 variants, we selected the *bw2* gene as target for  
101 genome editing as it has been done previously (Schuster et al. 2016), however, we designed  
102 one sgRNA in which the entire 20 nt spacer is matched to the target (including the first G  
103 required for the transcription under U6 promoter) (**Fig. 1a**). In order to increase the  
104 throughput and facilitate the evaluation of on-target and off-target effect at the same time, a  
105 GFP reporter strain SG200-19MM was generated based on the solopathogenic *U. maydis*  
106 strain SG200. The GFP was expressed under control of the *otef* promoter, which confers  
107 strong expression under axenic culture growth conditions. The expression cassette was  
108 flanked by two designed off-targets, which contained a single nucleotide mismatch at 19th  
109 PAM-proximal position compares to the designed *bw2* sgRNA (**Fig. 1a**). The cassette was  
110 integrated into the *ip* (iron-sulphur protein) locus (Broomfield and Hargreaves 1992) of  
111 SG200 by homologous recombination (**Fig. 1a**). Single copy integration into the *ip* locus was  
112 confirmed by southern blot (not shown). The resulting strain SG200-19MM showed a stable  
113 GFP signal in induced filaments on charcoal PD plates (**Fig. 1b, c**). Our reporter screen is

114 based on two readouts: on-target disruption of the *bw2* gene in SG200-19MM causes loss of  
115 filamentous growth on charcoal PD plates (fuzz- phenotype, in case of the frame-shift) (**Fig.**  
116 **1b, c**). In addition, double strand break on the 19MM off-target will result in the loss of the  
117 GFP signal due to the cleavage of the GFP expression cassette from the genome as  
118 consequence of off-target editing (**Fig. 1b, c**).

119

### 120 **Specificity of Cas9 variants in *U. maydis***

121 Three high fidelity Cas9 variants, Cas9HF1, Cas9esp1.1 and Cas9hypo, were generated by  
122 inserting the required point mutations into the *U. maydis* codon optimized Cas9wt (Chen et  
123 al. 2017; Kleinstiver et al. 2016; Schuster et al. 2016; Slaymaker et al. 2016) (Fig1. c). The  
124 resulting Cas9 variants HF1, esp1.1 and hypo were then used to knock out the *bw2* gene in  
125 SG200-19MM (**Fig1. d**). Transformants were first cultured in YEPS light medium overnight  
126 then dropped on charcoal PD plates to test the filament induction and detect the GFP signal.  
127 Four independent transformations were conducted, and each 46-48 independent colonies  
128 per treatment (23-24 for the first replicate) were tested on charcoal PD plate for phenotyping.  
129 The transformants that lost the GFP signal were considered to contain the off-target editing  
130 due to the cleavage of GFP expression cassette (**Fig. 1c**). The off-target ratio was calculated  
131 by the number of colonies without GFP signal divided by the total number of colonies tested  
132 and compared between Cas9wt and the different the high fidelity variants. In all 4  
133 independent experiments, Cas9HF1 resulted in consistently and significantly reduced off  
134 targeting by 8.97-25.72% compared to Cas9wt (**Fig. 2a, b**). We next compared the fuzz-rate  
135 of transformants, which reflects the successful disruption of target *bw2* genes. Here,  
136 Cas9HF1 did not show any obvious compromised on-target efficiency compared to Cas9wt  
137 (**Fig. 2c**). To our surprise, the other two Cas9 variants, Cas9esp1.1 and Cas9hypo did not  
138 enhance fidelity, but exhibited higher off-target effect compared to Cas9wt (**Fig. 2a, b**),  
139 however the on target editing efficiency is not affected (**Fig. 2c, d**). Based on this result, we  
140 identified Cas9HF1 as the most specific Cas9 variant without detectable reduction in on-  
141 target efficiency.

142

### 143 **CRISPR-Cas9 off-target effects in *U. maydis***

144 In a next experiment, we performed whole genome re-sequencing to investigate whether  
145 CRISPR-Cas9 mediated gene knock-out causes any unexpected mutations during genome  
146 editing. In addition to the *bw2* gene, we targeted the *U. maydis fly1* gene which encodes a  
147 secreted fungalsin metalloprotease. Deletion of *fly1* results in reduced virulence and altered  
148 cell-separation of *U. maydis* in axenic culture (Ökmen et al. 2018). The CRISPR-Cas9  
149 constructs expressing Cas9wt/Cas9HF1 together with sgRNAs for *bw2* or *fly1* were applied  
150 to strain SG200 separately. Genomic DNA of 8 independent colonies from each treatment

151 were randomly chosen and subjected for Illumina sequencing. All transformants were tested  
152 to confirm the loss of CRISPR-Cas9 plasmid before DNA preparation. Before sequencing,  
153 the transformants were confirmed for successful on target editing by test of filament growth  
154 on charcoal PD plates for *bw2* knockouts, or T7 endonuclease I digestion assay for *fly1*  
155 knockouts, respectively. As a control, untransformed cells of the progenitor strain SG200  
156 were sequenced to generate high quality reference genome.

157 In total, Illumina sequencing yielded between 8.4 and 12.6 million reads for the  
158 different samples resulting in an average gene coverage ranging between 45 and 66x. The  
159 SG200 reads were first mapped to the public available *U. maydis* reference genome  
160 “*U.maydis* 521” (Kämper et al. 2006) to create the SG200 reference, which excludes  
161 variations related to natural diversity between 521 and the SG200 strain used in our  
162 laboratory. The reads from the CRISPR-Cas9 transformants were then mapped to SG200  
163 reference for variation calling. In total, we detected 78 deletions, 72 insertions and 225 SNVs  
164 (single nucleotide variant) from the CRISPR-Cas9 editing mutants (**Fig. 3a**). Since the error  
165 prone NHEJ was considered to generate Indel in the genome, we excluded the SNVs from  
166 off-target analysis. From all the Indels identified, we also excluded the INDELS which were  
167 present in all mutants (**Fig. 3b**). These all-present Indels have the same mutated sequence  
168 from all 4 different treatments compared to SG200 which implies these INDELS were  
169 spontaneous mutations in the SG200 cultures during protoplast preparation. In order to  
170 investigate whether the Indels were caused by off-target effect of CRISPR-Cas9 genome  
171 editing process, we used Cas-OFFinder (Bae, Park, and Kim 2014) to predict the possible  
172 off-targets of *bw2* and *fly1* sgRNAs in the *U. maydis* genome. A relaxed condition of “10  
173 mismatches with one DNA/RNA bulge” was used as standard for prediction and none of  
174 these INDELS can be determined as off-target. Hence, we concluded that no off-target were  
175 generated during CRISPR-Cas9 genome editing.

176

## 177 Discussion

178 To evaluate Cas9 specificity we generated a reporter strain SG200-19MM for fast *in vivo*  
179 detection of on target and off target editings simultaneously. The off-targeting in SG200-  
180 19MM simply determined by the loss of GFP signal due to the cleavage of GFP expression  
181 cassette in the genome which is flanked by two designed off-targets based on the *bw2*  
182 sgRNA. Previously, reporter strain systems facilitated off-target evaluation and helped to  
183 identified new Cas9 high specific variants in baker's yeast (Casini et al. 2018). This *U.*  
184 *maydis* SG200-19MM reporter strain was applied successfully in our study and can be used  
185 for testing any new emerging high specific Cas9 in future. Moreover, without the knowledge  
186 of known sgRNA causing off target mutations, this method is advantageous compared to  
187 testing different mismatched sgRNA for off-targeting. The sgRNA in such engineered cells

188 will preferably bind to the 100% matched target over the mismatched off-targets, which might  
189 be more close to the native situation when unspecific genome editing is happening. In  
190 addition, using one sgRNA to detect on/off targeting at the same time eliminates the putative  
191 effect from the potentially variable difference amongst different sgRNAs sequences and  
192 different transformation events.

193 Our results showed that Cas9HF1 has an enhanced specificity compared to Cas9wt  
194 in *U. maydis*. Cas9 requires a minimal perfect match of the spacer to the target in the “seed  
195 region” (the first 8-12 PAM proximal nucleotides of the guide region) for cleavage  
196 (Semenova et al. 2011; Zhang et al. 2015), and the position of mismatch in the spacer  
197 affects the potential of off-targeting (Chen et al. 2017). We tested the 19th PAM proximal  
198 mismatch, which is more tolerated by Cas9, explaining the general high off-target events  
199 detected and small difference observed between Cas9HF1 and wildtype in the reporter  
200 strain assay. To our surprise, Cas9esp1.1 and Cas9hypo did not reduce off-target frequency  
201 over Cas9wt, but instead showed a higher rate of off-targeting. All these Cas9 variants were  
202 generated by the 3D structure based engineering method to change the energy  
203 requirements of the Cas9-sgRNA complex or sgRNA-target binding. This however could be  
204 affected by the intracellular environment of different species, which might be a possible  
205 explanation for the high unspecific targeting observed for Cas9esp1.1 and Cas9hypo.

206 In this study we could not observe any off-target activity Cas9wt and Cas9HF1 after  
207 the editing of the genes *bw2* and *fly2*. This is consistent with previous study in *U. maydis*  
208 (Schuster et al. 2016), although in this study we tested different sgRNAs and more  
209 independent colonies. The *U. maydis* genome is small, compact and largely lacks repetitive  
210 sequences, and together these features likely contribute to a low risk of Cas9-mediated off-  
211 site effects. Furthermore, the CRISPR-Cas9 module is transiently expressed in an  
212 autonomous replication plasmid, which can be quickly cleaned up from cell, short the  
213 interacting time of Cas9-sgRNA complex and genome. However, when multiplexing different  
214 sgRNAs in one construct required an elongated incubation to increase the life-time of  
215 CRISPR-Cas9 in the cell. While this might increase the chance of the off-targeting, use of  
216 Cas9HF1 in such experiments will greatly increase the specificity of editing, prevent the risk  
217 of off-targets.

218

## 219 **Materials and methods**

220

### 221 **Strains and growth condition**

222 The plasmids were transformed in *Escherichia coli* Top10 strains, and cultured in dYT liquid  
223 medium or YT plate with corresponding antibiotic. The solopathogenic *U. maydis* strain

224 SG200 (*a1 mfa2 b1 bw2*) and SG200-19MM were cultured in YEPS light liquid medium or  
225 potato dextrose (PD, Difco) plate, or PD plate with 1% active charcoal for filament induction.  
226

### 227 **Strain and plasmid construction**

228 To generate strain SG200-19MM, the oligos containing the off-targets 5'-  
229 TATAGAACTCGAGCAGCTGAG**TAACAAGAAAATTTATACGAGG**AAGCTTGCATGCCTG  
230 CAGGTCG-3' and 5'-CATGAGAATTCATCGATGAT**TAACAAGAAAATTTATACGAGG**  
231 GATATCAGATCTGCCGGTCTCCC-3' (off-target sequences were in bold, PAM sequences  
232 were underlined) were introduced into the flank region of GFP expression cassette in p123  
233 plasmid in HindIII and EcoRV site sequentially by Gibson assembly (New England Biolabs,  
234 Ipswich, USA). The resulting plasmid p123-19MM was then linearized by SspI and  
235 transformed into SG200 protoplast as described previously (Schulz et al. 1990). The DNA of  
236 transformants was isolated and in-locus integration and copy number of insertions was  
237 confirmed by Southern blotting.

238 The Cas9 high fidelity variants were generated by “QuikChange Multi Site-Directed  
239 Mutagenesis Kit” (Agilent Technologies, CA, USA) with primers listed in **supplemental table**  
240 **1**. To change the antibiotic resistance gene for the selection in *U. maydis*, the plasmids were  
241 digested with BsrGI, and integrated with hygromycin resistance cassette amplified from  
242 plasmid pUMa1507 (Terfrüchte et al. 2014) by Gibson Assembly (New England Biolabs,  
243 Ipswich, USA).

244 To construct the CRISPR vectors for gene knockout in *U. maydis*, sgRNAs were  
245 designed by E-CRISPR (<http://www.e-crisp.org/E-CRISP/aboutpage.html>) (Heigwer, Kerr,  
246 and Boutros 2014) (**supplemental table 1**). A similar approach was used for plasmid  
247 construction as described by Schuster et al. with some modifications (Schuster et al. 2016).  
248 In brief, 59 nt spacer oligomers containing the 20 nt “spacer” and 19 nucleotides (5'  
249 upstream, overlap to plasmid) and 20 nucleotides (3' downstream, overlap to scaffold) were  
250 ordered (Sigma, Darmstadt, Germany). The different Cas9 vectors were linearized with  
251 restriction enzyme Acc65I, and assembled with spacer oligo and “scaffold RNA” fragment  
252 with 3' downstream 20 bp overlap to the plasmid by Gibson Assembly.

253

### 254 **Phenotyping and T7 endonuclease I digestion assay**

255 The *bw2* gene knockout vectors were transformed into protoplasts of *U. maydis* strain  
256 SG200 or reporter strains SG200-19MM as previously described (Fotheringham and  
257 Holloman 1990). The transformants were transferred onto a new PD plate to grow overnight  
258 at 28°C, then the fresh colonies were picked and cultured in 300 µl YEPS light medium in  
259 96-deep well plate with 200 rpm shaking at 28°C for 16-20 hours. 10 µl of overnight culture  
260 was dropped on charcoal PD plates for filament induction I and /or detection of GFP signal

261 by ChemiDoc™ MP Imaging System (Bio-Rad, CA, USA). For the T7 endonuclease I assay,  
262 the genomic DNA of *fly1* knockouts and wildtype SG200 were prepared and a ~630 bp  
263 region containing the editing site was amplified by Phusion DNA polymerase (New England  
264 Biolabs, Ipswich, USA) using the primers listed in **supplemental table 1**. Equal amount of  
265 wildtype and mutant PCR products were mixed and annealing to produce hybrid and  
266 digestion with 0.5 U T7 endonuclease I for 15 min at 37°C and then detected on agarose gel.

267

## 268 **Whole genome sequencing and off-target analysis**

269 The *bw2* and *fly1* gene knockout mutants by Cas9wt and Cas9HF1 were cultured in YEPS  
270 light liquid medium overnight at 28°C, 200rpm. The DNA was prepared and purified by  
271 “MasterPure™ Complete DNA and RNA Purification Kit Bulk Reagents” (Epicentre,  
272 Wisconsin, USA). The DNA libraries were constructed using the Nextera DNA Flex Library  
273 Prep Kit, and paired-end sequencing was performed on the HiSeq4000 platform producing  
274 75 bp long reads at the Cologne Center for Genomics (Cologne, Germany). Reads were  
275 checked for their quality with FastQC (v.0.11.6) and then used for further analysis (Andrews  
276 and Babraham Bioinformatics 2010)  
277 <https://www.bioinformatics.babraham.ac.uk/projects/fastqc>).

278 To create a SG200 *U. maydis* reference strain for read mapping, the assembly of  
279 strain 521 was used to map the SG200 sequence reads and subsequently call the variant to  
280 create a consensus strain (Kämper et al. 2006). Read-mapping was performed with the  
281 Burrows-Wheeler Aligner (BWA-MEM, v.0.7.17) (Li 2013). The variants (SNP and INDEL)  
282 were called using GATK after duplicate removal (McKenna et al. 2010). A new consensus  
283 genome, where the variants were implemented, was created using bcftools consensus  
284 (Narasimhan et al. 2016). This process of read-mapping and variant calling was iterated 9  
285 times, so that a consensus strain was obtained where no variants could be called based on  
286 the SG200 reads. This consensus strain, hereafter called SG200 genome assembly, was  
287 then used as a reference to call variants to sequenced *U. maydis* strains that underwent  
288 mutagenesis through the CRISPR-Cas system. Similar as in the creation of the SG200  
289 genome assembly, reads were mapped and variants were called with BWA-MEM (v.0.7.17)  
290 and GATK, respectively (Li 2013; McKenna et al. 2010). Only variants were called in  
291 genome regions where SG200 reads had coverage between 20-100x with the SG200  
292 genome assembly. In addition, with the GATK VariantFiltration option the following  
293 requirements were set for variant calling: SNP = “QD < 2.0 || FS > 60.0 || MQ < 40.0 ||  
294 MQRankSum < -12.5 || ReadPosRankSum < -8.0” and INDEL = “QD < 2.0 || FS > 200.0 ||  
295 ReadPosRankSum < -20.0”. To see if variants corresponded to likely CRISPR-Cas off-target  
296 locations, off-targets were predicted in the SG200 genome assembly using Cas-OFFinder  
297 (Bae et al. 2014).



298  
299  
300  
301  
302  
303  
304  
305  
306  
307  
308  
309  
310  
311  
312  
313  
314  
315  
316  
317  
318  
319  
320  
321  
322  
323  
324  
325  
326  
327  
328  
329  
330  
331  
332  
333  
334  
335  
336  
337  
338  
339  
340  
341  
342  
343  
344  
345  
346

## Data availability

The genome sequencing data from Cas9wt and Cas9HF1 mediated *bw2* and *fly1* knockouts have been deposit in NCBI under the accession number PRJNA545211.

## Acknowledgements

We acknowledge funding from the European Research Council under the European Union's Horizon 2020 research and innovation program (consolidator grant conVIRgens, ID 771035), as well as funding by the Deutsche Forschungsgemeinschaft (DFG, German Research Foundation) under Germany's Excellence Strategy – EXC-2048/1 – Project ID: 390686111.

## Reference

- Andrews, Simon and Babraham Bioinformatics. 2010. "FastQC: A Quality Control Tool for High Throughput Sequence Data." *Manual*.
- Bae, Sangsu, Jeongbin Park, and Jin Soo Kim. 2014. "Cas-OFFinder: A Fast and Versatile Algorithm That Searches for Potential off-Target Sites of Cas9 RNA-Guided Endonucleases." *Bioinformatics*.
- Barrangou, Rodolphe, Christophe Fremaux, H el ene Deveau, Melissa Richards, Patrick Boyaval, Sylvain Moineau, Dennis A. Romero, and Philippe Horvath. 2007. "CRISPR Provides Acquired Resistance against Viruses in Prokaryotes." *Science*.
- B olker, Michael, Martin Urban, and Regine Kahmann. 1992. "The a Mating Type Locus of *U. Maydis* Specifies Cell Signaling Components." *Cell* 68(3):441–50.
- Casini, Antonio, Michele Olivieri, Gianluca Petris, Claudia Montagna, Giordano Reginato, Giulia Maule, Francesca Lorenzin, Davide Prandi, Alessandro Romanel, Francesca Demichelis, Alberto Inga, and Anna Cereseto. 2018. "A Highly Specific SpCas9 Variant Is Identified by in Vivo Screening in Yeast." *Nature Biotechnology*.
- Charpentier, Emmanuelle Emmanuelle and Jennifer A. Doudna. 2013. "Rewriting a Genome." *Nature*.
- Chen, Baohui, Luke A. Gilbert, Beth A. Cimini, Joerg Schnitzbauer, Wei Zhang, Gene Wei Li, Jason Park, Elizabeth H. Blackburn, Jonathan S. Weissman, Lei S. Qi, and Bo Huang. 2013. "Dynamic Imaging of Genomic Loci in Living Human Cells by an Optimized CRISPR/Cas System." *Cell*.
- Chen, Baohui, Jeffrey Hu, Ricardo Almeida, Harrison Liu, Sanjeev Balakrishnan, Christian Covill-Cooke, Wendell A. Lim, and Bo Huang. 2016. "Expanding the CRISPR Imaging Toolset with *Staphylococcus Aureus* Cas9 for Simultaneous Imaging of Multiple Genomic Loci." *Nucleic Acids Research*.
- Chen, Janice S., Yavuz S. Dagdas, Benjamin P. Kleinstiver, Moira M. Welch, Alexander A. Sousa, Lucas B. Harrington, Samuel H. Sternberg, J. Keith Joung, Ahmet Yildiz, and Jennifer A. Doudna. 2017. "Enhanced Proofreading Governs CRISPR-Cas9 Targeting Accuracy." *Nature*.
- Davis, Kevin M., Vikram Pattanayak, David B. Thompson, John A. Zuris, and David R. Liu. 2015. "Small Molecule-Triggered Cas9 Protein with Improved Genome-Editing Specificity." *Nature Chemical Biology*.
- Djamei, Armin, Kerstin Schipper, Franziska Rabe, Anupama Ghosh, Volker Vincon, J org Kahnt, Sonia Osorio, Takayuki Tohge, Alisdair R. Fernie, Ivo Feussner, Kirstin Feussner, Peter Meinicke, York Dieter Stierhof, Heinz Schwarz, Boris MacEk, Matthias Mann, and Regine Kahmann. 2011. "Metabolic Priming by a Secreted Fungal Effector." *Nature*.

- 347 Doehlemann, Gunther, Karina Van Der Linde, Daniela Aßmann, Daniela Schwammbach,  
348 Alexander Hof, Amitabh Mohanty, David Jackson, and Regine Kahmann. 2009. "Pep1,  
349 a Secreted Effector Protein of *Ustilago Maydis*, Is Required for Successful Invasion of  
350 Plant Cells." *PLoS Pathogens*.
- 351 Fotheringham, S. and W. K. Holloman. 1990. "Pathways of Transformation in *Ustilago*  
352 *Maydis* Determined by DNA Conformation." *Genetics*.
- 353 Fu, Yanfang, Jennifer A. Foden, Cyd Khayter, Morgan L. Maeder, Deepak Reyon, J. Keith  
354 Joung, and Jeffry D. Sander. 2013. "High-Frequency off-Target Mutagenesis Induced  
355 by CRISPR-Cas Nucleases in Human Cells." *Nature Biotechnology*.
- 356 Fu, Yanfang, Jeffry D. Sander, Deepak Reyon, Vincent M. Cascio, and J. Keith Joung. 2014.  
357 "Improving CRISPR-Cas Nuclease Specificity Using Truncated Guide RNAs." *Nature*  
358 *Biotechnology*.
- 359 Gasiunas, G., R. Barrangou, P. Horvath, and V. Siksnys. 2012. "Cas9-CrRNA  
360 Ribonucleoprotein Complex Mediates Specific DNA Cleavage for Adaptive Immunity in  
361 Bacteria." *Proceedings of the National Academy of Sciences*.
- 362 Guilinger, John P., David B. Thompson, and David R. Liu. 2014. "Fusion of Catalytically  
363 Inactive Cas9 to FokI Nuclease Improves the Specificity of Genome Modification."  
364 *Nature Biotechnology*.
- 365 Heigwer, Florian, Grainne Kerr, and Michael Boutros. 2014. "E-CRISP: Fast CRISPR Target  
366 Site Identification." *Nature Methods*.
- 367 Hsu, Patrick D., David A. Scott, Joshua A. Weinstein, F. Ann Ran, Silvana Konermann,  
368 Vineeta Agarwala, Yinqing Li, Eli J. Fine, Xuebing Wu, Ophir Shalem, Thomas J.  
369 Cradick, Luciano A. Marraffini, Gang Bao, and Feng Zhang. 2013. "DNA Targeting  
370 Specificity of RNA-Guided Cas9 Nucleases." *Nature Biotechnology*.
- 371 Jiang, Fuguo and Jennifer A. Doudna. 2017. "CRISPR-Cas9 Structures and Mechanisms."  
372 *Annual Review of Biophysics*.
- 373 Jinek, Martin, Krzysztof Chylinski, Ines Fonfara, Michael Hauer, Jennifer A. Doudna, and  
374 Emmanuelle Charpentier. 2012. "A Programmable Dual-RNA-Guided DNA  
375 Endonuclease in Adaptive Bacterial Immunity." *Science*.
- 376 Kämper, Jörg, Regine Kahmann, Michael Bölker, Li Jun Ma, Thomas Brefort, Barry J.  
377 Saville, Flora Banuett, James W. Kronstad, Scott E. Gold, Olaf Müller, Michael H.  
378 Perlin, Han A. B. Wösten, Ronald De Vries, José Ruiz-Herrera, Cristina G. Reynaga-  
379 Peña, Karen Snetselaar, Michael McCann, José Pérez-Martín, Michael Feldbrügge,  
380 Christoph W. Basse, Gero Steinberg, Jose I. Ibeas, William Holloman, Plinio Guzman,  
381 Mark Farman, Jason E. Stajich, Rafael Sentandreu, Juan M. González-Prieto, John C.  
382 Kennell, Lazaro Molina, Jan Schirawski, Artemio Mendoza-Mendoza, Doris Greilinger,  
383 Karin Münch, Nicole Rössel, Mario Scherer, Miroslav Vraněs, Oliver Ladendorf, Volker  
384 Vincon, Uta Fuchs, Björn Sandrock, Shaowu Meng, Eric C. H. Ho, Matt J. Cahill, Kylie  
385 J. Boyce, Jana Klose, Steven J. Klosterman, Heine J. Deelstra, Lucila Ortiz-  
386 Castellanos, Weixi Li, Patricia Sanchez-Alonso, Peter H. Schreier, Isolde Häuser-Hahn,  
387 Martin Vaupel, Edda Koopmann, Gabi Friedrich, Hartmut Voss, Thomas Schlüter,  
388 Jonathan Margolis, Darren Platt, Candace Swimmer, Andreas Gnirke, Feng Chen,  
389 Valentina Vysotskaia, Gertrud Mannhaupt, Ulrich Güldener, Martin Münsterkötter, Dirk  
390 Haase, Matthias Oesterheld, Hans Werner Mewes, Evan W. Mauceli, David DeCaprio,  
391 Claire M. Wade, Jonathan Butler, Sarah Young, David B. Jaffe, Sarah Calvo, Chad  
392 Nusbaum, James Galagan, and Bruce W. Birren. 2006. "Insights from the Genome of  
393 the Biotrophic Fungal Plant Pathogen *Ustilago Maydis*." *Nature*.
- 394 Khrunyk, Yuliya, Karin Münch, Kerstin Schipper, Andrei N. Lupas, and Regine Kahmann.  
395 2010. "The Use of FLP-Mediated Recombination for the Functional Analysis of an  
396 Effector Gene Family in the Biotrophic Smut Fungus *Ustilago Maydis*." *New Phytologist*.
- 397 Kim, Sojung, Taegeun Bae, Jaewoong Hwang, and Jin Soo Kim. 2017. "Rescue of High-  
398 Specificity Cas9 Variants Using SgRNAs with Matched 5' Nucleotides." *Genome*  
399 *Biology*.
- 400 Kleinstiver, Benjamin P., Vikram Pattanayak, Michelle S. Prew, Shengdar Q. Tsai, Nhu T.  
401 Nguyen, Zongli Zheng, and J. Keith Joung. 2016. "High-Fidelity CRISPR-Cas9

- 402 Nucleases with No Detectable Genome-Wide off-Target Effects.” *Nature*.
- 403 Kosicki, Michael, Kärt Tomberg, and Allan Bradley. 2018. “Repair of Double-Strand Breaks  
404 Induced by CRISPR–Cas9 Leads to Large Deletions and Complex Rearrangements.”  
405 *Nature Biotechnology*.
- 406 Li, Heng. 2013. “Aligning Sequence Reads, Clone Sequences and Assembly Contigs with  
407 BWA-MEM.” *ArXiv Preprint ArXiv:1303.3997*.
- 408 Liao, Hsin Kai, Fumiyuki Hatanaka, Toshikazu Araoka, Pradeep Reddy, Min Zu Wu, Yinghui  
409 Sui, Takayoshi Yamauchi, Masahiro Sakurai, David D. O’Keefe, Estrella Núñez-  
410 Delicado, Pedro Guillen, Josep M. Campistol, Cheng Jang Wu, Li Fan Lu, Concepcion  
411 Rodriguez Esteban, and Juan Carlos Izpisua Belmonte. 2017. “In Vivo Target Gene  
412 Activation via CRISPR/Cas9-Mediated Trans-Epigenetic Modulation.” *Cell*.
- 413 Ma, Hanhui, Ardan Naseri, Pablo Reyes-Gutierrez, Scot A. Wolfe, Shaojie Zhang, and  
414 Thoru Pederson. 2015. “Multicolor CRISPR Labeling of Chromosomal Loci in Human  
415 Cells.” *Proceedings of the National Academy of Sciences*.
- 416 Ma, Lay Sun, Lei Wang, Christine Trippel, Artemio Mendoza-Mendoza, Steffen Ullmann,  
417 Marino Moretti, Alexander Carsten, Jörg Kahnt, Stefanie Reissmann, Bernd Zechmann,  
418 Gert Bange, and Regine Kahmann. 2018. “The Ustilago Maydis Repetitive Effector  
419 Rsp3 Blocks the Antifungal Activity of Mannose-Binding Maize Proteins.” *Nature*  
420 *Communications*.
- 421 McKenna, Aaron, Matthew Hanna, Eric Banks, Andrey Sivachenko, Kristian Cibulskis,  
422 Andrew Kernytsky, Kiran Garimella, David Altshuler, Stacey Gabriel, Mark Daly, and  
423 Mark A. DePristo. 2010. “The Genome Analysis Toolkit: A MapReduce Framework for  
424 Analyzing next-Generation DNA Sequencing Data.” *Genome Research*.
- 425 Mueller, André N., Sebastian Ziemann, Steffi Treitschke, Daniela Aßmann, and Gunther  
426 Doehlemann. 2013. “Compatibility in the Ustilago Maydis-Maize Interaction Requires  
427 Inhibition of Host Cysteine Proteases by the Fungal Effector Pit2.” *PLoS Pathogens*.
- 428 Narasimhan, Vagheesh, Petr Danecek, Aylwyn Scally, Yali Xue, Chris Tyler-Smith, and  
429 Richard Durbin. 2016. “BCFtools/RoH: A Hidden Markov Model Approach for Detecting  
430 Autozygosity from next-Generation Sequencing Data.” *Bioinformatics*.
- 431 Ökmen, Bilal, Bastian Kemmerich, Daniel Hilbig, Raphael Wemhöner, Jörn Aschenbroich,  
432 Andreas Perrar, Pitter F. Huesgen, Kerstin Schipper, and Gunther Doehlemann. 2018.  
433 “Dual Function of a Secreted Fungalysin Metalloprotease in Ustilago Maydis.” *New*  
434 *Phytologist*.
- 435 Pulecio, Julian, Nipun Verma, Eva Mejía-Ramírez, Danwei Huangfu, and Angel Raya. 2017.  
436 “CRISPR/Cas9-Based Engineering of the Epigenome.” *Cell Stem Cell*.
- 437 Redkar, Amey, Rafal Hoser, Lena Schilling, Bernd Zechmann, Magdalena Krzymowska,  
438 Virginia Walbot, and Gunther Doehlemann. 2015. “ A Secreted Effector Protein of  
439 Ustilago Maydis Guides Maize Leaf Cells to Form Tumors .” *The Plant Cell*.
- 440 Schulz, Burkhard, Flora Banuett, Marlis Dahl, Ramona Schlesinger, Willi Schäfer, Thomas  
441 Martin, Ira Herskowitz, and Regine Kahmann. 1990. “The b Alleles of U. Maydis, Whose  
442 Combinations Program Pathogenic Development, Code for Polypeptides Containing a  
443 Homeodomain-Related Motif.” *Cell*.
- 444 Schuster, Mariana, Gabriel Schweizer, and Regine Kahmann. 2018. “Comparative Analyses  
445 of Secreted Proteins in Plant Pathogenic Smut Fungi and Related Basidiomycetes.”  
446 *Fungal Genetics and Biology* 112:21–30.
- 447 Schuster, Mariana, Gabriel Schweizer, Stefanie Reissmann, and Regine Kahmann. 2016.  
448 “Genome Editing in Ustilago Maydis Using the CRISPR-Cas System.” *Fungal Genetics*  
449 *and Biology*.
- 450 Semenova, E., M. M. Jore, K. A. Datsenko, A. Semenova, E. R. Westra, B. Wanner, J. van  
451 der Oost, S. J. J. Brouns, and K. Severinov. 2011. “Interference by Clustered Regularly  
452 Interspaced Short Palindromic Repeat (CRISPR) RNA Is Governed by a Seed  
453 Sequence.” *Proceedings of the National Academy of Sciences*.
- 454 Skibbe, David S., Gunther Doehlemann, John Fernandes, and Virginia Walbot. 2010. “Maize  
455 Tumors Caused by Ustilago Maydis Require Organ-Specific Genes in Host and  
456 Pathogen.” *Science*.

- 457 Slaymaker, Ian M., Linyi Gao, Bernd Zetsche, David A. Scott, Winston X. Yan, and Feng  
458 Zhang. 2016. "Rationally Engineered Cas9 Nucleases with Improved Specificity."  
459 *Science*.
- 460 Spellig, T., M. Bölker, F. Lottspeich, R. W. Frank, and R. Kahmann. 1994. "Pheromones  
461 Trigger Filamentous Growth in *Ustilago Maydis*." *The EMBO Journal*.
- 462 Tanaka, Shigeyuki, Thomas Brefort, Nina Neidig, Armin Djamei, Jörg Kahnt, Wilfred  
463 Vermerris, Stefanie Koenig, Kirstin Feussner, Ivo Feussner, and Regine Kahmann.  
464 2014. "A Secreted *Ustilago Maydis* Effector Promotes Virulence by Targeting  
465 Anthocyanin Biosynthesis in Maize." *ELife*.
- 466 Tanenbaum, Marvin E., Luke A. Gilbert, Lei S. Qi, Jonathan S. Weissman, and Ronald D.  
467 Vale. 2014. "A Protein-Tagging System for Signal Amplification in Gene Expression and  
468 Fluorescence Imaging." *Cell*.
- 469 Terfrüchte, Marius, Bastian Joehnk, Rosa Fajardo-Somera, Gerhard H. Braus, Meritxell  
470 Riquelme, Kerstin Schipper, and Michael Feldbrügge. 2014. "Establishing a Versatile  
471 Golden Gate Cloning System for Genetic Engineering in Fungi." *Fungal Genetics and  
472 Biology*.
- 473 Zhang, Dingbo, Huawei Zhang, Tingdong Li, Kunling Chen, Jin-Long Qiu, and Caixia Gao.  
474 2017. "Perfectly Matched 20-Nucleotide Guide RNA Sequences Enable Robust  
475 Genome Editing Using High-Fidelity SpCas9 Nucleases." *Genome Biology* 18(1):191.
- 476 Zhang, Xiao Hui, Louis Y. Tee, Xiao Gang Wang, Qun Shan Huang, and Shi Hua Yang.  
477 2015. "Off-Target Effects in CRISPR/Cas9-Mediated Genome Engineering." *Molecular  
478 Therapy - Nucleic Acids*.
- 479 Zuo, Weiliang, Bilal ökmen, Jasper R.L. Depotter, Malaika Ebert, Amey Redkar, Johana  
480 Misas-Villamil, and Gunther Döhlemann. 2019. "Molecular Interactions Between  
481 *Ustilago* (or Smut) Pathogens and Their Hosts." *Annual Review of Phytopathology*. (in  
482 prep)
- 483

484  
485  
486

## Figure Legends

487  
488

489 **Fig1. Construction of SG200 GFP reporter strain and test of Cas9 high specific**  
490 **variants. a)** Scheme showing the construction of reporter strain SG200-19MM. *bw2*  
491 sgRNA and its 19th PAM-proximal off-targets sequences were shown. The red font  
492 indicated the nucleotide change between on and off targets, and the PAM sequences  
493 were underlined. The off-targets were inserted into the flank region of GFP expression  
494 cassette and the GFP cassette was integrated into the *U. maydis ip* (succinate  
495 dehydrogenase iron–sulfur protein subunit) locus and resulted in carboxin resistance of  
496 SG200-19MM. **b)** Scheme showing the phenotype of on-target and off-target effects in  
497 the reporter strain. *cbx\**: carboxin susceptible allele in *U. maydis* which containing one  
498 amino acid change compared to the functional allele that make *U. maydis* susceptible to  
499 carboxin.  $\frac{1}{2}$  *cbx* indicate the vector was linearized by cut *cbx* resistance allele into two  
500 halves for the homolog recombination. **c)** Phenotypes of on-target and off-target  
501 genome editing. The photo showed the fuzz / fuzz- growth of wild type and *bw2*  
502 knockouts on charcoal PD plate, the GFP image showed the off-target editing loss the  
503 GFP signal. **d)** The plasmids used for off-target testing and the corresponding  
504 mutations in the Cas9 variants tested. The Hygromycin resistance was used for  
505 selection on the free circulating plasmid containing Cas9.

506  
507  
508

509 **Fig2. Evaluation of on-target and off-target efficiency of different Cas9 high specificity**  
510 **variants in the SG200-19MM reporter strain. a)** The off-target rate of different Cas9  
511 variants in *U. maydis*. Off-targeting was detected by the number of colonies lost GFP  
512 signal, and **b)** The summary result of 4 replicates, Cas9HF1 showed 8.97-25.72%  
513 significantly reduced off-targeting compared to wt, whereas the Cas9esp1.1 and  
514 Cas9hypo showed significantly higher off-targeting rate. **c)** On-target efficiency of Ca9  
515 variants. The on target editing was revealed by the fuzz- colonies, which do not grow  
516 filamentous on charcoal PD plates. **d)** The summary of on target editing efficiency of  
517 different Cas9 variants. all three high fidelity Cas9 variant showed similar editing  
518 efficiency. Student *t-test* was used for statistical analysis. \*,  $p < 0.05$ . \*\*,  $p < 0.01$ .

519  
520  
521

522 **Fig3. Whole genome sequencing of Cas9wt and Cas9HF1 editing mutants. a)** Box-and-  
523 Whisker plot showed the total number of deletion, insertion and SNP identified from  
524 *bw2* and *fly1* knockouts. **b)** Venn diagram showed the distribution of mutations from  
525 different sgRNA and Cas9. 23.1% of deletions, 18.1% of insertions and 47.1% SNPs  
526 were detected from different treatment indicated they were generated during protoplast  
527 preparation.

528  
529  
530  
531  
532

533 **Supplementary information**

534

535

536 **Supplementary Fig1. Filament growth induction and T7 endonuclease I assay to**  
537 **confirm the on-target editing in *bw2* and *fly1* knockouts respectively. a)** 10  $\mu$ l  
538 culture of *bw2* knockouts were drop on charcoal PD plate to detected the ability of  
539 filament. Two drops from each 8 independent mutants were tested, the middle red circle  
540 indicated the SG200 control. **b)** T7 endonuclease I digestion of PCR product from *fly1*  
541 genes. The arrow indicated the expected big digest product after T7 endonuclease I  
542 digestion.

543

544 **Supplemental table 1. Primers used in this study.**

545

**Figure 1**

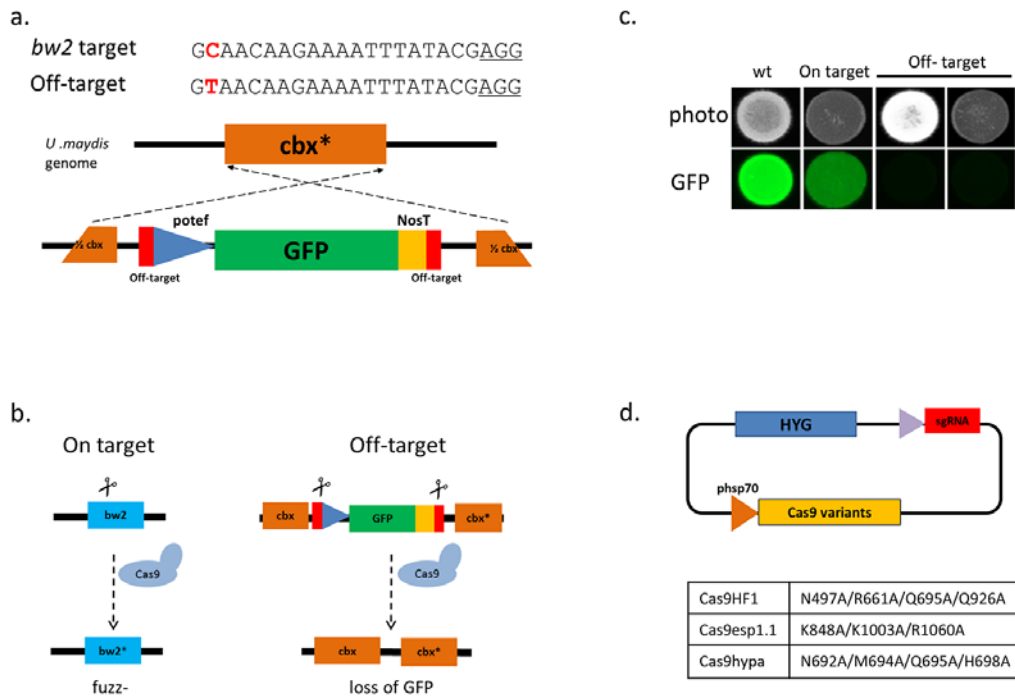

**Fig1. Construction of SG200 GFP reporter strain and test of Cas9 high specific variants.**

**a)** Scheme showing the construction of reporter strain SG200-19MM. *bw2* sgRNA and its 19th PAM-proximal off-targets sequences were shown. The red font indicated the nucleotide change between on and off targets, and the PAM sequences were underlined. The off-targets were inserted into the flank region of GFP expression cassette and the GFP cassette was integrated into the *U. maydis ip* (succinate dehydrogenase iron-sulfur protein subunit) locus and resulted in carboxin resistance of SG200-19MM. **b)** Scheme showing the phenotype of on-target and off-target effects in the reporter strain. *cbx\**: carboxin susceptible allele in *U. maydis* which containing one amino acid change compared to the functional allele that make *U. maydis* susceptible to carboxin.  $\frac{1}{2}$  *cbx* indicate the vector was linearized by cut *cbx* resistance allele into two halves for the homolog recombination. **c)** Phenotypes of on-target and off-target genome editing. The photo showed the fuzz / fuzz- growth of wild type and *bw2* knockouts on charcoal PD plate, the GFP image showed the off-target editing loss the GFP signal. **d)** The plasmids used for off-target testing and the corresponding mutations in the Cas9 variants tested. The Hygromycin resistance was used for selection on the free circulating plasmid containing Cas9.

**Figure 2**

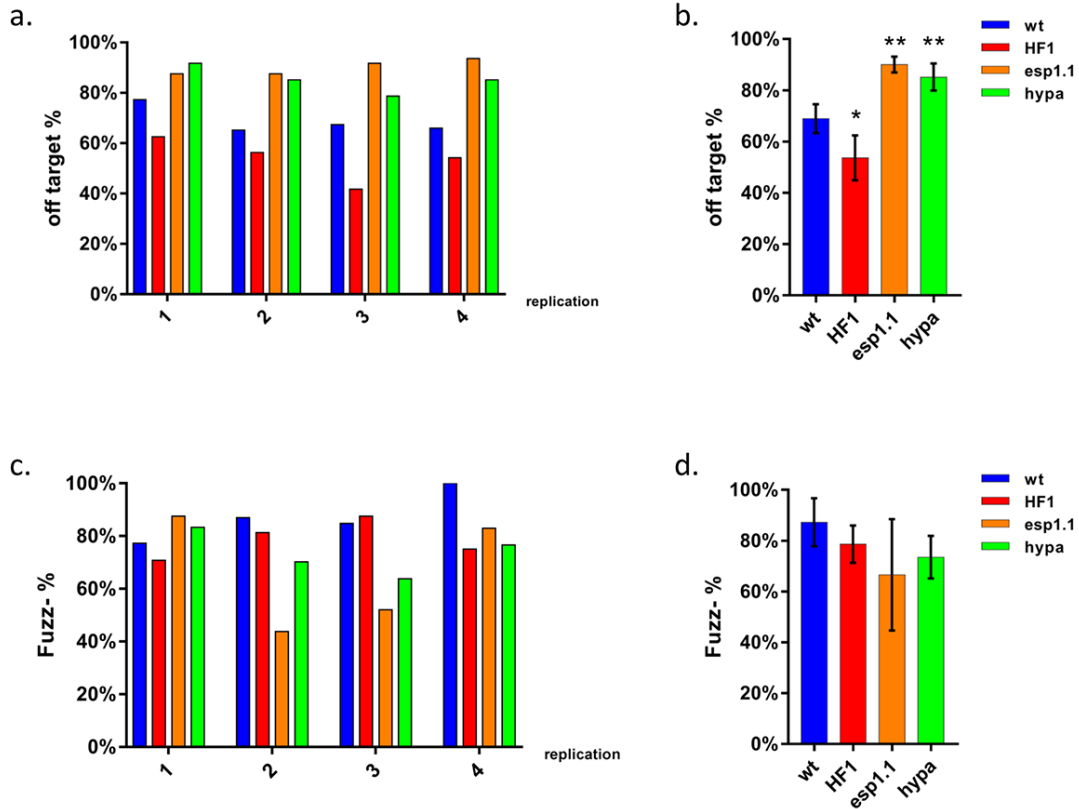

**Fig2. Evaluation of on-target and off-target efficiency of different Cas9 high specificity variants in the SG200-19MM reporter strain.** **a)** The off-target rate of different Cas9 variants in *U. maydis*. Off-targeting was detected by the number of colonies lost GFP signal, and **b)** The summary result of 4 replicates, Cas9HF1 showed 8.97-25.72% significantly reduced off-targeting compared to wt, whereas the Cas9esp1.1 and Cas9hypo showed significantly higher off-targeting rate. **c)** On-target efficiency of Cas9 variants. The on target editing was revealed by the fuzz- colonies, which do not grow filamentous on charcoal PD plates. **d)** The summary of on target editing efficiency of different Cas9 variants. all three high fidelity Cas9 variant showed similar editing efficiency. Student *t*-test was used for statistical analysis. \*,  $p < 0.05$ . \*\*,  $p < 0.01$ .
